# Supplementary material
Source: publisher figshare collection journal article supplement (https://tandf.figshare.com/articles/dataset/_/7339490)
Supplement: Supplementary file 2 [file 1]

```

1  use
   "H:\chen_do\AQI_2014-2016_dofile&data\0521_data\AQI_Weather_FuelPrices_Cropharvest_spatialP
   M_monsoon_wind.dta"
2  cd H:\chen_do\AQI_2014-2016_dofile&data\0521_data
3
4  sum windspeed maxspeed
5  replace windspeed = windspeed * 10
6  replace maxspeed = maxspeed * 10
7  sum windspeed maxspeed
8
9  drop cys cym
10 gen cym=cityid*1000+(year-2010)*100+month
11
12 gen ymd = mdy(month,day,year)
13 duplicates report cym day
14 duplicates report cityid ymd
15
16 duplicates drop cym day,force
17 save AQI_Weather_FuelPrices_Cropharvest_spatialPM_monsoon_wind_windspeed.dta
18
19 use
   "H:\chen_do\AQI_2014-2016_dofile&data\0521_data\AQI_Weather_FuelPrices_Cropharvest_spatialP
   M_monsoon_wind_windspeed.dta"
20 cd H:\chen_do\AQI_2014-2016_dofile&data\0521_data
21
22 gen corn_harvest= Summer_corn_harvest + Spring_corn_harvest
23 gen rice_harvest= Early_rice_harvest + Middle_rice_harvest + Lata_rice_harvest
24 save AQI_Weather_FuelPrices_Cropharvest_spatialPM_monsoon_wind_windspeed_rice.dta
25
26 gen pro_id=real(substr(string(citycode2010),1,2))
27 tab pro_id
28
29 xtset cityid ymd, daily
30 gen llconcentration_PM25=l.concentration_PM25
31 label var llconcentration_PM25 "Temporally lagged PM25"
32
33 gen pymd=pro_id*100000+(year-2010)*10000+month*100+day
34 xtset cym day
35 tab corn_harvest
36 tab Summer_corn_harvest
37 tab Spring_corn_harvest
38 tab Middle_rice_harvest
39 tab Wheat_harveat
40 tab Early_rice_harvest
41 tab Lata_rice_harvest
42 gen yd_rice=0
43 replace yd_rice=1 if Early_rice_harvest==1
44 replace yd_rice=1 if Middle_rice_harvest ==1
45 replace yd_rice=1 if Lata_rice_harvest ==1
46 gen yd_corn=0
47 replace yd_corn=1 if Summer_corn_harvest ==1
48 replace yd_corn=1 if Spring_corn_harvest ==1
49 gen yd_wheat=0
50 replace yd_wheat=1 if Wheat_harveat ==1
51 gen yd_any=0
52 replace yd_any=1 if Early_rice_harvest==1
53 replace yd_any=1 if Middle_rice_harvest ==1
54 replace yd_any=1 if Lata_rice_harvest ==1
55 replace yd_any=1 if Summer_corn_harvest ==1
56 replace yd_any=1 if Spring_corn_harvest ==1
57 replace yd_any=1 if Wheat_harveat ==1
58 save AQI_Weather_FuelPrices_Cropharvest_spatialPM_monsoon_wind_windspeed_rice_yd.dta
59
60 //广东的油价和贵州的油价有问题
61 replace price_gasoline=7420 if price_gasoline==742
62 replace price_gasoline=7065 if price_gasoline==6065
63 save AQI_Weather_FuelPrices_Cropharvest_spatialPM_monsoon_wind_windspeed_rice_yd_oil.dta
64
65 //替换周末1-7,7和1为周六和周日
66 use
   "H:\chen_do\AQI_2014-2016_dofile&data\0521_data\AQI_Weather_FuelPrices_Cropharvest_spatialP
   M_monsoon_wind_windspeed_rice_yd_oil.dta"
67 cd H:\chen_do\AQI_2014-2016_dofile&data\0521_data
68 replace weekend=1 if weekday==7

```

```

69  replace weekend=1 if weekday==1
70  save
   AQI_Weather_FuelPrices_Cropharvest_spatialPM_monsoon_wind_windspeed_rice_yd_oil_weekend.dta
71
72
73  //baseline
74  use
   "D:\chen_do\AQI_Weather_FuelPrices_Cropharvest_spatialPM_monsoon_wind_windspeed_rice_yd_oil_
   _weekend.dta"
75  cd D:\chen_do
76  log using baseline.log
77
78
79  xtset cym day
80
81
82  xtivreg2 concentration_PM25 llconcentration_PM25 precipitation sunshine maxtemp mintemp
   windspeed pressure avhumid price_gasoline yd_rice yd_corn yd_wheat holiday weekend if
   wintermonsoon==1, fe cluster(cityid pymd)
83  estimates store model1
84  xtivreg2 concentration_PM25 llconcentration_PM25 s1 precipitation sunshine maxtemp mintemp
   windspeed pressure avhumid price_gasoline yd_rice yd_corn yd_wheat holiday weekend if
   wintermonsoon==1, fe cluster(cityid pymd)
85  estimates store model2
86  xtivreg2 concentration_PM25 llconcentration_PM25 s1 s1_lag precipitation sunshine maxtemp
   mintemp windspeed pressure avhumid price_gasoline yd_rice yd_corn yd_wheat holiday weekend
   if wintermonsoon==1, fe cluster(cityid pymd)
87  estimates store model3
88  outreg2 [model1 model2 model3] using "results\baseline_Table3_Wintermonsoon", see replace
   word dec(3)
89
90  estpost summarize concentration_PM10 concentration_PM25 precipitation sunshine maxtemp
   mintemp windspeed pressure avhumid price_gasoline yd_rice yd_corn yd_wheat holiday weekend
   if e(sample)==1, listwise
91  esttab, cells("mean sd min max") nomtitle nonumber
92
93  xtreg precipitation i.year if wintermonsoon==1, fe
94  predict precipitation_r, e
95  xtreg sunshine i.year if wintermonsoon==1, fe
96  predict sunshine_r, e
97  xtreg maxtemp i.year if wintermonsoon==1, fe
98  predict maxtemp_r, e
99  xtreg mintemp i.year if wintermonsoon==1, fe
100 predict mintemp_r, e
101 xtreg windspeed i.year if wintermonsoon==1, fe
102 predict windspeed_r, e
103 xtreg pressure i.year if wintermonsoon==1, fe
104 predict pressure_r, e
105 xtreg avhumid i.year if wintermonsoon==1, fe
106 predict avhumid_r, e
107 pwcorr precipitation_r sunshine_r maxtemp_r mintemp_r windspeed_r pressure_r avhumid_r, sig
108 drop precipitation_r sunshine_r maxtemp_r mintemp_r windspeed_r pressure_r avhumid_r
109
110
111 xtivreg2 concentration_PM25 llconcentration_PM25 precipitation sunshine maxtemp mintemp
   windspeed pressure avhumid price_gasoline yd_rice yd_corn yd_wheat holiday weekend if
   summermonsoon==1, fe cluster(cityid pymd)
112 estimates store model4
113 xtivreg2 concentration_PM25 llconcentration_PM25 s1 precipitation sunshine maxtemp mintemp
   windspeed pressure avhumid price_gasoline yd_rice yd_corn yd_wheat holiday weekend if
   summermonsoon==1, fe cluster(cityid pymd)
114 estimates store model5
115 xtivreg2 concentration_PM25 llconcentration_PM25 s1 s1_lag precipitation sunshine maxtemp
   mintemp windspeed pressure avhumid price_gasoline yd_rice yd_corn yd_wheat holiday weekend
   if summermonsoon==1, fe cluster(cityid pymd)
116 estimates store model6
117 outreg2 [model4 model5 model6] using "results\baseline_Table3_Summermonsoon", see replace
   word dec(3)
118 estpost summarize concentration_PM10 concentration_PM25 precipitation sunshine maxtemp
   mintemp windspeed pressure avhumid price_gasoline yd_rice yd_corn yd_wheat holiday weekend
   if e(sample)==1, listwise
119 esttab, cells("mean sd min max") nomtitle nonumber
120
121 xtreg precipitation i.year if summermonsoon==1, fe

```

```

122 predict precipitation_r, e
123 xtreg sunshine i.year if summermonsoon==1, fe
124 predict sunshine_r, e
125 xtreg maxtemp i.year if summermonsoon==1, fe
126 predict maxtemp_r, e
127 xtreg mintemp i.year if summermonsoon==1, fe
128 predict mintemp_r, e
129 xtreg windspeed i.year if summermonsoon==1, fe
130 predict windspeed_r, e
131 xtreg pressure i.year if summermonsoon==1, fe
132 predict pressure_r, e
133 xtreg avhumid i.year if summermonsoon==1, fe
134 predict avhumid_r, e
135 pwcorr precipitation_r sunshine_r maxtemp_r mintemp_r windspeed_r pressure_r avhumid_r, sig
136 drop precipitation_r sunshine_r maxtemp_r mintemp_r windspeed_r pressure_r avhumid_r
137
138 log close
139
140 //提前准备component_wintermosoon和component_summermosoon.dta
141 use "D:\chen_do\data\component_wintermosoon.dta"
142 drop M_total- cityid
143 save "D:\chen_do\data\component_wintermosoon.dta", replace
144
145 use "D:\chen_do\data\component_summermosoon.dta"
146 drop M_total- cityid
147 save "D:\chen_do\data\component_summermosoon.dta", replace
148
149 //component winter&summer
150 *****
151 *the following code generate city-specific contribution in wintermonsoon
152 *in the component.dta gen (M_slag+M_stlag)/M_total is the percentage contributions of PM
from upwind cities
153 *****
154 *specify the control vars
155 loc control3= "precipitation sunshine maxtemp mintemp windspeed pressure avhumid
price_gasoline yd_rice yd_corn yd_wheat holiday weekend"
156 *load data
157 use
"D:\chen_do\AQI_Weather_FuelPrices_Cropharvest_spatialPM_monsoon_wind_windspeed_rice_yd_oil
_weekend.dta", clear
158 cd H:\chen_do
159 keep if wintermonsoon==1
160 drop if cityid==144
161
162 *baseline regression for wintermonsoon, i just keep the observations used in the
regression to save time
163 xtreg concentration_PM25 llconcentration_PM25 s1 s1_lag `control3', fe
164
165 *xtreg concentration_PM10 llconcentration_PM10 `control3' if summermonsoon==1, fe /*use
this line for summermonsoon, we will get another dataset*/
166 keep if e(sample)==1
167 preserve
168
169 levelsof cityid, local(levels) /*list the name of all cities*/
170
171 foreach l of local levels {
172
173 restore, preserve
174
175 keep if cityid==`l'
176
177 dis "the city is "`l'"
178 xtreg concentration_PM25 llconcentration_PM25 s1 s1_lag `control3', fe /*we don't need
to add cluster, because we std error doesn't affect predicted value*/
179 predict TotalEffect, xb
180
181 gen TlagEffect=_b[llconcentration_PM25]*llconcentration_PM25/TotalEffect if _b[
llconcentration_PM25]>=0 /*predict y_hat, i.e. total effect*/
182 replace TlagEffect=0 if _b[llconcentration_PM25]<0 /*replace y_hat as zero if the
coefficient is insignificant*/
183
184 gen SlagEffect=_b[s1]*s1/TotalEffect if _b[s1]>=0 /*predict the part explained by
spatial lag*/
185 replace SlagEffect=0 if _b[s1]<0

```

```

186
187   gen STlagEffect=_b[s1_lag]*s1_lag/TotalEffect if _b[s1_lag]>=0 /*predict the part
explained by spatial and temporal lag*/
188   replace STlagEffect=0 if _b[s1_lag]<0
189   gen N=e(N)
190
191   collapse (mean) M_total=TotalEffect M_tlag=TlagEffect M_slag=SlagEffect M_stlag=
STlagEffect N /*average predicted value for each city*/
192   keep if _n==1
193   gen cityid=`1'
194   keep cityid M_* N
195   append using data\component_wintermosoon
196   sort cityid
197   save data\component_wintermosoon,replace
198   }
199   restore
200
201   *****
202   *the following code generate city-specific contribution in summermonsoon
203   *in the component.dta gen (M_slag+M_stlag)/M_total is the percentage contributions of PM
from upwind cities
204   *****
205   *specify the control vars
206   loc control3= "precipitation sunshine maxtemp mintemp windspeed pressure avhumid
price_gasoline yd_rice yd_corn yd_wheat holiday weekend"
207   *load data
208   use
"D:\chen_do\AQI_Weather_FuelPrices_Cropharvest_spatialPM_monsoon_wind_windspeed_rice_yd_oil
_weekend.dta",clear
209   cd D:\chen_do
210   keep if summermonsoon==1
211   drop if cityid==144
212
213   *baseline regression for wintermonsoon, i just keep the observations used in the
regression to save time
214   xtreg concentration_PM25 llconcentration_PM25 s1 s1_lag `control3', fe
215
216   *xtreg concentration_PM10 llconcentration_PM10 `control3' if summermonsoon==1, fe /*use
this line for summermonsoon, we will get another dataset*/
217   keep if e(sample)==1
218   preserve
219
220   levelsof cityid,local(levels) /*list the name of all cities*/
221
222   foreach l of local levels {
223
224     restore, preserve
225
226     keep if cityid==`l'
227
228     dis "the city is "`l'"
229     xtreg concentration_PM25 llconcentration_PM25 s1 s1_lag `control3', fe /*we don't need
to add cluster, because we std error doesn't affect predicted value*/
230     predict TotalEffect, xb
231
232     gen TlagEffect=_b[llconcentration_PM25]*llconcentration_PM25/TotalEffect if _b[
llconcentration_PM25]>=0 /*predict y_hat, i.e. total effect*/
233     replace TlagEffect=0 if _b[llconcentration_PM25]<0 /*replace y_hat as zero if the
coefficient is insignificant*/
234
235     gen SlagEffect=_b[s1]*s1/TotalEffect if _b[s1]>=0 /*predict the part explained by
spatial lag*/
236     replace SlagEffect=0 if _b[s1]<0
237
238     gen STlagEffect=_b[s1_lag]*s1_lag/TotalEffect if _b[s1_lag]>=0 /*predict the part
explained by spatial and temporal lag*/
239     replace STlagEffect=0 if _b[s1_lag]<0
240     gen N=e(N)
241
242     collapse (mean) M_total=TotalEffect M_tlag=TlagEffect M_slag=SlagEffect M_stlag=
STlagEffect N /*average predicted value for each city*/
243     keep if _n==1
244     gen cityid=`l'
245     keep cityid M_* N

```

```

246 append using data\component_summermosoon
247 sort cityid
248 save data\component_summermosoon,replace
249 }
250 restore
251
252
253 use "D:\chen_do\data\component_summermosoon.dta",clear
254 cd D:\chen_do\data
255 replace M_slag=0 if M_slag<0
256 replace M_stlag=0 if M_stlag<0
257 gen share=(M_slag+M_stlag)*100
258 sum share
259 drop if cityid==.
260 merge 1:1 cityid using cityhan_cityid.dta
261 drop _merge
262 save component_summermosoon_cityhan.dta
263
264 use "D:\chen_do\data\component_wintermosoon.dta",clear
265 cd D:\chen_do\data
266 replace M_slag=0 if M_slag<0
267 replace M_stlag=0 if M_stlag<0
268 gen share=(M_slag+M_stlag)*100
269 sum share
270 drop if cityid==.
271 merge 1:1 cityid using cityhan_cityid.dta
272 drop _merge
273 save component_wintermosoon_cityhan.dta
274
275 //生成city_plain
276 use "H:\chen_do\AQI_2014-2016_dofile&data\0521_data\14-16_city_province_name.dta"
277 cd H:\chen_do\AQI_2014-2016_dofile&data\0521_data
278 gen plain=0
279 replace plain=1 if provincehan=="黑龙江"
280 replace plain=1 if provincehan=="吉林"
281 replace plain=1 if provincehan=="辽宁"
282 replace plain=1 if provincehan=="北京"
283 replace plain=1 if provincehan=="天津"
284 replace plain=1 if provincehan=="河北"
285 replace plain=1 if provincehan=="山东"
286 replace plain=1 if provincehan=="河南"
287 replace plain=1 if provincehan=="安徽"
288 replace plain=1 if provincehan=="江苏"//江苏属于两个平原
289 replace plain=1 if provincehan=="湖北"
290 replace plain=1 if provincehan=="湖南"
291 replace plain=1 if provincehan=="江西"
292 replace plain=1 if provincehan=="安徽"
293 replace plain=1 if provincehan=="浙江"
294 replace plain=1 if provincehan=="上海"
295 replace plain=1 if cityhan=="西安"
296 replace plain=1 if cityhan=="临潼"
297 replace plain=1 if cityhan=="长安"
298 replace plain=1 if cityhan=="咸阳"
299 replace plain=1 if cityhan=="三原"
300 replace plain=1 if cityhan=="渭南"
301 replace plain=1 if cityhan=="铜川"
302 replace plain=1 if cityhan=="杨陵"
303 replace plain=1 if cityhan=="宝鸡"
304 replace plain=1 if cityhan=="彬县"
305 replace plain=1 if cityhan=="黄陵"
306 replace plain=1 if cityhan=="韩城"
307 replace plain=1 if cityhan=="华阴"
308 replace plain=1 if cityhan=="商洛"
309 save city_plain.dta
310
311 //计算每个城市的平均PM2.5
312
313 use
314 "H:\chen_do\AQI_2014-2016_dofile&data\0521_data\corn\AQI_Weather_FuelPrices_Cropharvest_spa
315 tialPM_monsoon_wind_windspeed_rice_yd_oil.dta"
316 cd H:\chen_do\AQI_2014-2016_dofile&data\0521_data\corn
317 gen winter_concentration_PM25= concentration_PM25 if wintermonsoon ==1
318 gen summer_concentration_PM25= concentration_PM25 if summermonsoon ==1
319 collapse (mean) m_winter_concentration_PM25=winter_concentration_PM25

```

```

m_summer_concentration_PM25=summer_concentration_PM25, by(cityhan)
318 save winter&summer_concentration_PM25.dta
319
320 //Fig C3 2&3&4
321 use
"H:\chen_do\AQI_2014-2016_dofile&data\0521_data\AQI_Weather_FuelPrices_Cropharvest_spatialP
M_monsoon_wind_windspeed_rice_yd_oil_weekend.dta", clear
322 cd H:\chen_do\AQI_2014-2016_dofile&data\0521_data
323 log using sensitivity.log
324 *FE regression
325 xtset cym day
326 xtivreg2 concentration_PM25 llconcentration_PM25 s2 s2_lag precipitation sunshine maxtemp
mintemp windspeed pressure avhumid price_gasoline yd_rice yd_corn yd_wheat holiday weekend
if wintermonsoon==1, fe cluster(cityid pymd)
327 estimates store Model_spatial2_Winter
328 lincom s2+s2_lag
329 xtivreg2 concentration_PM25 llconcentration_PM25 s3 s3_lag precipitation sunshine maxtemp
mintemp windspeed pressure avhumid price_gasoline yd_rice yd_corn yd_wheat holiday weekend
if wintermonsoon==1, fe cluster(cityid pymd)
330 estimates store Model_spatial3_Winter
331 lincom s3+s3_lag
332 xtivreg2 concentration_PM25 llconcentration_PM25 s4 s4_lag precipitation sunshine maxtemp
mintemp windspeed pressure avhumid price_gasoline yd_rice yd_corn yd_wheat holiday weekend
if wintermonsoon==1, fe cluster(cityid pymd)
333 estimates store Model_spatial4_Winter
334 lincom s4+s4_lag
335 xtivreg2 concentration_PM25 llconcentration_PM25 s2 s2_lag precipitation sunshine maxtemp
mintemp windspeed pressure avhumid price_gasoline yd_rice yd_corn yd_wheat holiday weekend
if summermonsoon==1, fe cluster(cityid pymd)
336 estimates store Model_spatial2_Summer
337 lincom s2+s2_lag
338 xtivreg2 concentration_PM25 llconcentration_PM25 s3 s3_lag precipitation sunshine maxtemp
mintemp windspeed pressure avhumid price_gasoline yd_rice yd_corn yd_wheat holiday weekend
if summermonsoon==1, fe cluster(cityid pymd)
339 estimates store Model_spatial3_Summer
340 lincom s3+s3_lag
341 xtivreg2 concentration_PM25 llconcentration_PM25 s1 s1_lag precipitation sunshine maxtemp
mintemp windspeed pressure avhumid price_gasoline yd_rice yd_corn yd_wheat holiday weekend
if summermonsoon==1, fe cluster(cityid pymd)
342 estimates store Model_spatial4_Summer
343 drop _est_Model_spatial4_Summer
344 xtivreg2 concentration_PM25 llconcentration_PM25 s4 s4_lag precipitation sunshine maxtemp
mintemp windspeed pressure avhumid price_gasoline yd_rice yd_corn yd_wheat holiday weekend
if summermonsoon==1, fe cluster(cityid pymd)
345 estimates store Model_spatial4_Summer
346 lincom s4+s4_lag
347 outreg2 [Model_spatial2_Winter Model_spatial3_Winter Model_spatial4_Winter
Model_spatial2_Summer Model_spatial3_Summer Model_spatial4_Summer] using
"results\sensitivity_Spatial", see replace word dec(3)
348
349 //Fig C3 5
350 **Scenario (4): Cluster by city AND by region-year-month-day
351 gen rymd=region*100000+(year-2010)*10000+month*100+day
352 xtivreg2 concentration_PM25 llconcentration_PM25 s1 s1_lag precipitation sunshine maxtemp
mintemp windspeed pressure avhumid price_gasoline yd_rice yd_corn yd_wheat holiday weekend
if wintermonsoon==1, fe cluster(cityid rymd)
353 estimates store RegionFE_Winter
354 lincom s1+s1_lag
355 xtivreg2 concentration_PM25 llconcentration_PM25 s1 s1_lag precipitation sunshine maxtemp
mintemp windspeed pressure avhumid price_gasoline yd_rice yd_corn yd_wheat holiday weekend
if summermonsoon==1, fe cluster(cityid rymd)
356 estimates store RegionFE_Summer
357 lincom s1+s1_lag
358
359 //Fig C3 8
360 **Scenario (5): further dropping samples
361 xtivreg2 concentration_PM25 llconcentration_PM25 s1 s1_lag precipitation sunshine maxtemp
mintemp windspeed pressure avhumid price_gasoline yd_rice yd_corn yd_wheat holiday weekend
if northwind==1 & wintermonsoon==1, fe cluster(cityid pymd)
362 estimates store CleanSample_Winter
363 lincom s1+s1_lag
364 xtivreg2 concentration_PM25 llconcentration_PM25 s1 s1_lag precipitation sunshine maxtemp
mintemp windspeed pressure avhumid price_gasoline yd_rice yd_corn yd_wheat holiday weekend
if souththwind==1 & summermonsoon==1, fe cluster(cityid pymd)

```



```

365 estimates store CleanSample_Summer
366 lincom s1+s1_lag
367
368 //Fig C3 7
369 **Scenario (6): add spatial PM distance only
370 xtivreg2 concentration_PM25 llconcentration_PM25 s1 s1_lag PM_distance precipitation
sunshine maxtemp mintemp windspeed pressure avhumid price_gasoline yd_rice yd_corn
yd_wheat holiday weekend if wintermonsoon==1, fe cluster(cityid pymd)
371 estimates store PMdistanceonly_Winter
372 lincom s1+s1_lag
373 xtivreg2 concentration_PM25 llconcentration_PM25 s1 s1_lag PM_distance precipitation
sunshine maxtemp mintemp windspeed pressure avhumid price_gasoline yd_rice yd_corn
yd_wheat holiday weekend if summermonsoon==1, fe cluster(cityid pymd)
374 estimates store PMdistanceonly_Summer
375 lincom s1+s1_lag
376 outreg2 [RegionFE_Winter CleanSample_Winter PMdistanceonly_Winter RegionFE_Summer
CleanSample_Summer PMdistanceonly_Summer] using "results\sensitivity_Scenarios4-6", see
replace word dec(3)
377
378 //Fig C3 6
379 **Scenario (7): city-year-season FE + month FE
380 gen cys=cityid*100+(year-2010)*10+season
381 gen smd=season*10000+month*100+day
382 gen md=month*100+day
383 xtset cys md
384 xi: xtivreg2 concentration_PM25 llconcentration_PM25 s1 s1_lag precipitation sunshine
maxtemp mintemp windspeed pressure avhumid price_gasoline yd_rice yd_corn yd_wheat holiday
weekend i.month if summermonsoon==1, fe cluster(cityid pymd)
385 estimates store MonthFE_Summer
386 lincom s1+s1_lag
387 xi: xtivreg2 concentration_PM25 llconcentration_PM25 s1 s1_lag precipitation sunshine
maxtemp mintemp windspeed pressure avhumid price_gasoline yd_rice yd_corn yd_wheat holiday
weekend i.month if wintermonsoon==1, fe cluster(cityid pymd)
388 estimates store MonthFE_Winter
389 lincom s1+s1_lag
390 outreg2 [MonthFE_Winter MonthFE_Summer] using "results\sensitivity_Scenario7", see replace
word dec(3)
391
392 //Fig C3 9&10
393 sort cityhan
394 merge cityhan using "city_plain_cityhan.dta"
395 xtivreg2 concentration_PM25 llconcentration_PM25 s1 s1_lag precipitation sunshine maxtemp
mintemp windspeed pressure avhumid price_gasoline yd_rice yd_corn yd_wheat holiday weekend
if wintermonsoon==1 & plain==1, fe cluster(cityid pymd)
396 tab _merge
397 drop if _merge==2
398 xtivreg2 concentration_PM25 llconcentration_PM25 s1 s1_lag precipitation sunshine maxtemp
mintemp windspeed pressure avhumid price_gasoline yd_rice yd_corn yd_wheat holiday weekend
if wintermonsoon==1 & plain==1, fe cluster(cityid pymd)
399 estimates store plain_winter
400 lincom s1+s1_lag
401 xtivreg2 concentration_PM25 llconcentration_PM25 s1 s1_lag precipitation sunshine maxtemp
mintemp windspeed pressure avhumid price_gasoline yd_rice yd_corn yd_wheat holiday weekend
if summermonsoon==1 & plain==1, fe cluster(cityid pymd)
402 estimates store plain_summer
403 lincom s1+s1_lag
404 xtivreg2 concentration_PM25 llconcentration_PM25 s1 s1_lag precipitation sunshine maxtemp
mintemp windspeed pressure avhumid price_gasoline yd_rice yd_corn yd_wheat holiday weekend
if wintermonsoon==1 & plain==0, fe cluster(cit pymd)
405 estimates store non_plain_winter
406 lincom s1+s1_lag
407 xtivreg2 concentration_PM25 llconcentration_PM25 s1 s1_lag precipitation sunshine maxtemp
mintemp windspeed pressure avhumid price_gasoline yd_rice yd_corn yd_wheat holiday weekend
if summermonsoon==1 & plain==0, fe cluster(cit pymd)
408 estimates store non_plain_summer
409 lincom s1+s1_lag
410 outreg2 [plain_winter plain_summer non_plain_winter non_plain_summer] using
"results\sensitivity_plains", see replace word dec(3)
411 save
AQI_Weather_FuelPrices_Cropharvest_spatialPM_monsoon_wind_windspeed_rice_yd_oil_sensitivity
.dta
412
413 //Fig C3 1
414 xtset cym day

```

```
415   xtivreg2 concentration_PM25 llconcentration_PM25 s1 sl_lag precipitation sunshine maxtemp  
      mintemp windspeed pressure avhumid price_gasoline yd_rice yd_corn yd_wheat holiday weekend  
      if wintermonsoon==1, fe cluster(cityid pymd)  
416   estimates store model3  
417   lincom s1+sl_lag  
418   xtivreg2 concentration_PM25 llconcentration_PM25 s1 sl_lag precipitation sunshine maxtemp  
      mintemp windspeed pressure avhumid price_gasoline yd_rice yd_corn yd_wheat holiday weekend  
      if summermonsoon==1, fe cluster(cityid pymd)  
419   estimates store model6  
420   lincom s1+sl_lag  
421   log close  
422
```
